# Supplementary material for: Embedding plasmonic gold nanoparticles in a ZnO layer enhanced the performance of inverted organic solar cells based on an indacenodithieno[3,2-b]thiophene-alt-5,5′-di(thiophen-2-yl)-2,2′-bithiazole-based push–pull polymer
Source: Royal Society of Chemistry journal article supplement (doi:10.1039/d3ra01078c), 2023-01-01
Supplement: d3ra01078c1.pdf [file d3ra01078c1.pdf]

## Supporting Information

Embedding plasmonic gold nanoparticles in ZnO layer enhanced the performance of inverted organic solar cells based on indacenodithieno [3,2-*b*]thiophene-*alt*-5,5'-di(thiophen-2-yl)-2,2'-bithiazole-based push-pull polymer

*Alemayehu G. Waketola*<sup>\*a</sup>, *Fekadu G. Hone*<sup>a</sup>, *Cathrine Pfukwa*<sup>b</sup>, *Pieter Neethlin*<sup>b</sup>, *Zewdneh Genene*<sup>d</sup>, *Ergang Wang*<sup>d</sup>, *Wendimagegne Mammo*<sup>c</sup>, *Gurthwin Bosman*<sup>b</sup>, *Newayemedhin A. Tegegne*<sup>a‡</sup>

<sup>a</sup> Department of Physics, Addis Ababa University, 1176, Addis Ababa, Ethiopia

<sup>b</sup> Laser Research Institute at the Department of Physics, Stellenbosch University, 7602, Stellenbosch, South Africa.

<sup>c</sup> Department of Chemistry, Addis Ababa University, 33658, Addis Ababa, Ethiopia

<sup>d</sup> Department of Chemistry and Chemical Engineering, Chalmers University of Technology, SE412 96, Goteborg, Sweden

\*Corresponding author(s). E-mail(s): [newaye.medhin@aau.edu.et](mailto:newaye.medhin@aau.edu.et);

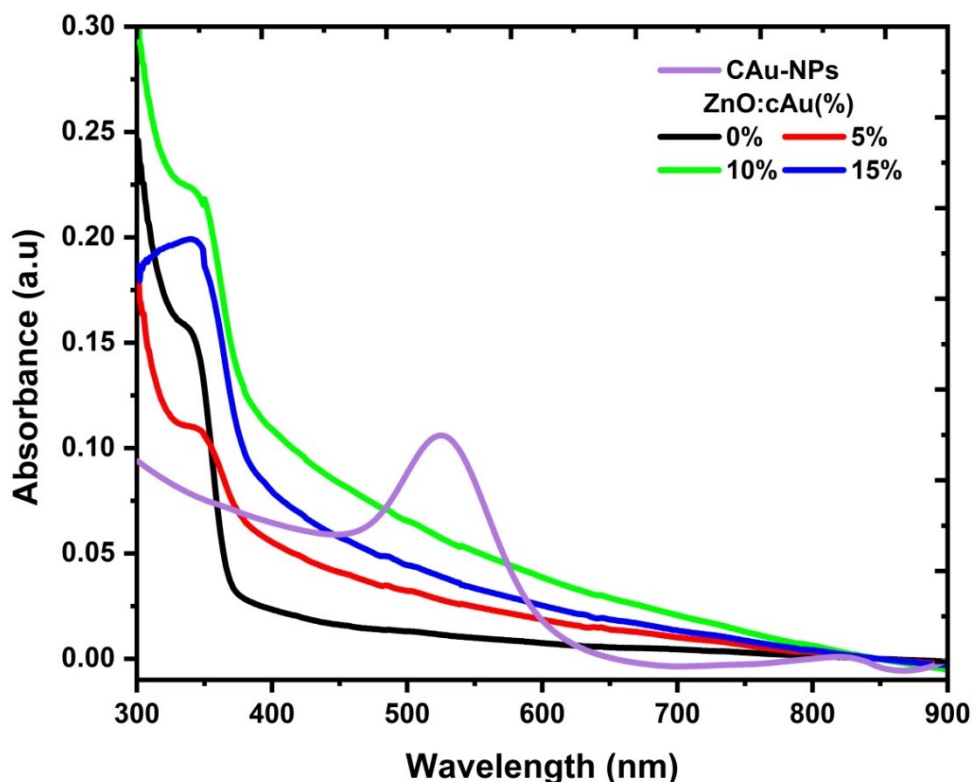

Figure S1:- The absorbance spectra of pure ZnO and cAu NPs embedded ZnO ETL

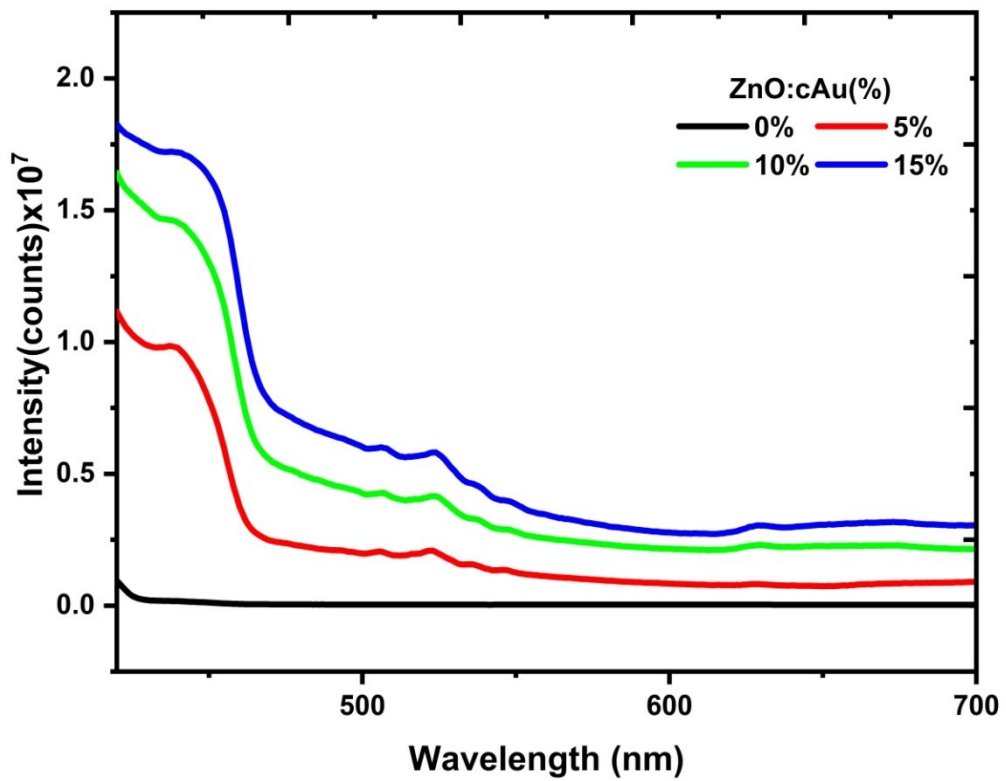

Figure S2:- The photoluminescence spectra of pure ZnO and cAu NPs embedded ZnO ETL

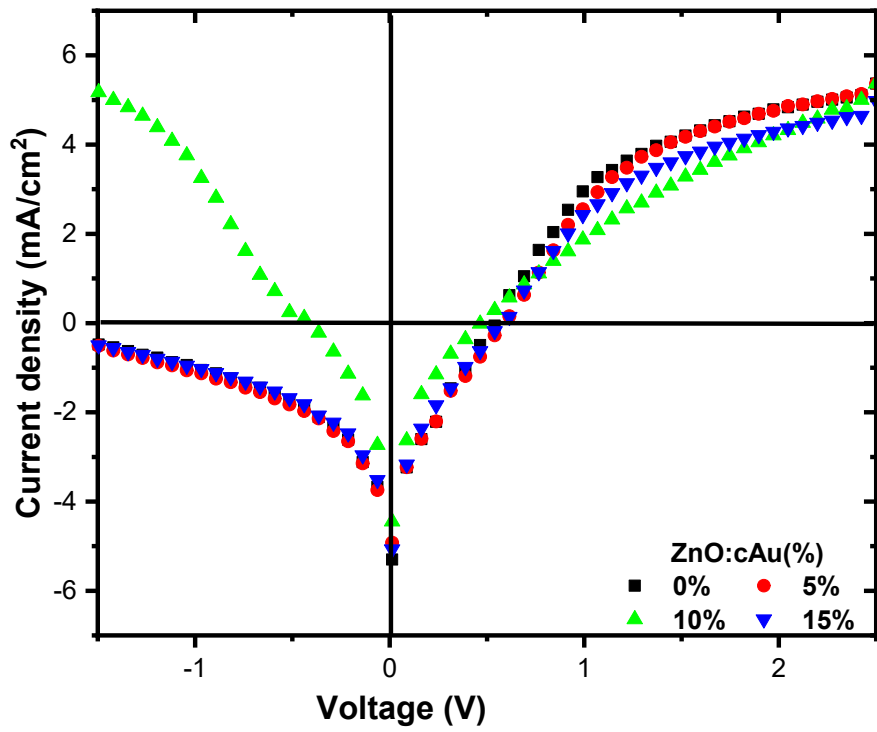

Fig.S3 J-V characteristics under dark condition

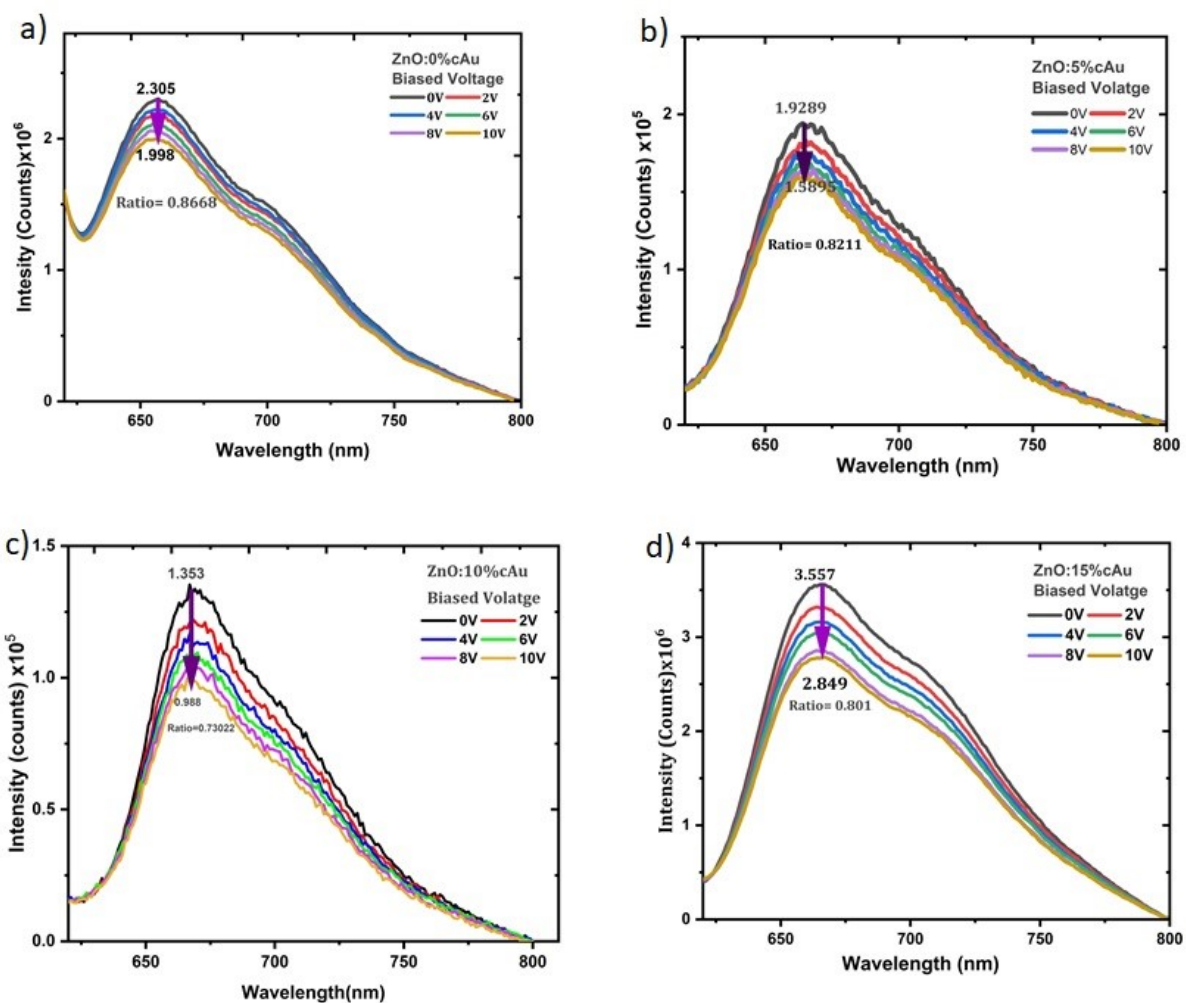

**Figure S4:-** The Photoluminescence spectra of donor polymer spin coated on pure ZnO and ZnO incorporated with different concentration of cAu NPs ETLs biased from 0V to 10V(a-d).

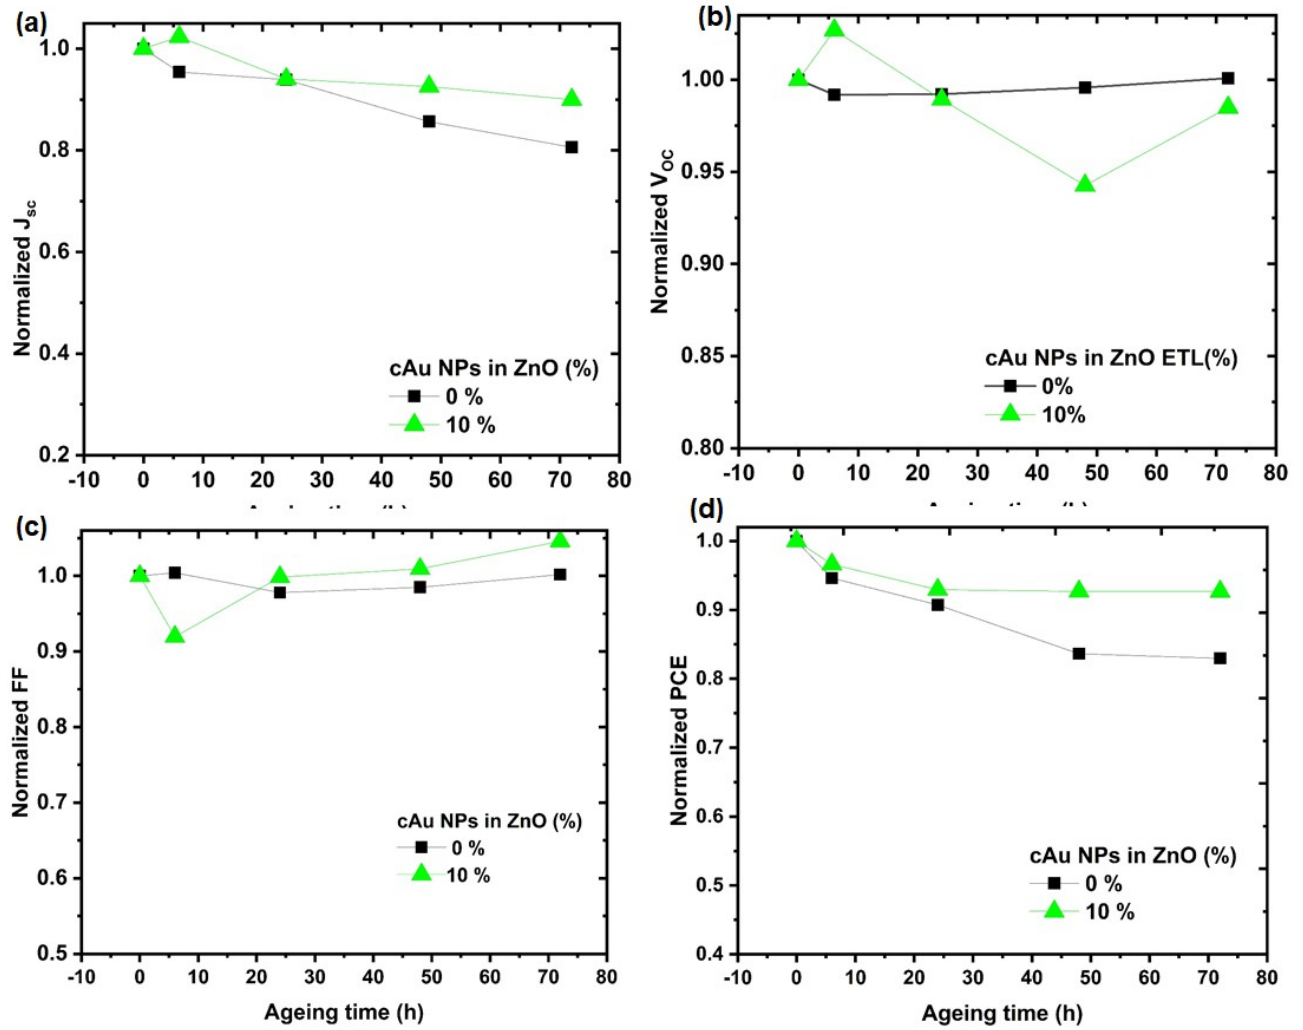

**Fig.S5:-** The durability of devices on shelf ageing based on J-V parameters for devices made on pristine ZnO and ZnO embedded with 10% cAu NPs.
